# Supplementary material for: A common variant in CLDN14 causes precipitous, prelingual sensorineural hearing loss in multiple families due to founder effect
Source: PubMed Central journal article supplement (PMC5215284; doi:10.1007/s00439-016-1746-7), 2016-11-12
Supplement: 439_2016_1746_MOESM1_ESM.pdf [file 439_2016_1746_MOESM1_ESM.pdf]

Article Title: A common mutation in *CLDN14* causes precipitous, prelingual sensorineural hearing loss in multiple families due to founder effect

Journal name: Human Genetics

Author names: Justin Pater, Tammy Benteau, Anne Griffin, Cindy Penney, Susan G. Stanton, Sarah Predham, Bernadine Kielley, Jessica Squires, Jiayi Zhou, Quan Li, Tammy Benteau, Nelly Abdelfatah, Darren D. O'Rielly, Terry-Lynn Young

Affiliation: Craig L. Dobbin Genetics Research Centre, Faculty of Medicine, Memorial University, 300 Prince Phillip Drive, St. John's, Newfoundland and Labrador, Canada, A1B 3V6

Email address: tlyoung@mun.ca

Supplementary Table 1. Recurrent Hearing Loss Mutations in Newfoundland

| Gene           | Accession No. | Variant                                                                         | DFN Locus | Locus (Cyto) |
|----------------|---------------|---------------------------------------------------------------------------------|-----------|--------------|
| <i>TMPRSS3</i> | NM_024022     | c. 207delC<br>c. 268 G>C<br>c. 782+3delGAG<br>c. 757 A>G<br>c. 612-2insTA       | DFNB8/10  | 21q22        |
| <i>WFS1</i>    | NM_006005.3   | c. 2146 G>A<br>c. 1832 A>G                                                      | DFNA6/38  | 4p16.3       |
| <i>PCDH15</i>  | NM_033056     | c. 1583 T>A<br>c. 1590 + 20 A>G                                                 | DFNB23    | 10p11.2-q21  |
| <i>KCNQ4</i>   | NM_004700     | c. 806delCCT                                                                    | DFNA2A    | 1p34         |
| <i>GJB2</i>    | NM_004004     | c.-23+1G>A<br>c. 35delG<br>c. 101 T>C<br>c. 229 T>C<br>c. 249 C>G<br>c. 167delT | DFNA3A/B1 | 13q11-q12    |
| <i>GJB6</i>    | NM_006783     | delD1351830<br>delD1351854                                                      | DFNA3B    | 13q12        |
| <i>GJB3</i>    | NM_024009.2   | c. 109 G>A                                                                      | DFNA2B    | 1p35.1       |
| <i>SMPX</i>    | NM_014332.2   | c. 99delC                                                                       | DFNX4     | Xp22         |
| <i>COCH</i>    | NM_004086.2   | c. 151 C>T                                                                      | DFNA9     | 14q12-q13    |
| <i>TECTA</i>   | NM_005422     | c. 26557 A>G                                                                    | DFNB21    | 11q          |
| <i>TMC1</i>    | NM_138691     | c. 421C>T                                                                       | DFNA36    | 9q13-a21     |
